# Supplementary material for: Comparison of FDA Approved Kinase Targets to Clinical Trial Ones: Insights from Their System Profiles and Drug-Target Interaction Networks
Source: PubMed Central journal article supplement (PMC4980536; doi:10.1155/2016/2509385), 2016-07-28

**Supplementary Material for:**

**Comparison of FDA approved kinase targets to clinical trial ones: insights from their  
system profiles and drug-target interaction networks**

Jingyu Xu<sup>1,2,+</sup>, Panpan Wang<sup>1,+</sup>, Hong Yang<sup>1,+</sup>, Jin Zhou<sup>1</sup>, Yinghong Li<sup>1</sup>, Xiaoxu Li<sup>1</sup>, Weiwei Xue<sup>1</sup>, Chunyan  
Yu<sup>1</sup>, Yubin Tian<sup>2</sup>, Feng Zhu<sup>1,\*</sup>

<sup>1</sup> Innovative Drug Research and Bioinformatics Group, School of Pharmaceutical Sciences and Innovative  
Drug Research Centre, Chongqing University, Chongqing 401331, China

<sup>2</sup> School of Mathematics and Statistics, Beijing Institute of Technology, Beijing100081, China

<sup>+</sup> These authors contributed equally

\* Corresponding author: Feng Zhu ([zhufeng@cqu.edu.cn](mailto:zhufeng@cqu.edu.cn))

**Supplementary Table S1:** The list of drugs targeting on at least one established kinase target together with their highest clinical trial status, code of ICD class, disease indication and their corresponding targets.

| <b>Drug Name</b> | <b>Highest clinical trial status</b> | <b>Code of ICD class</b> | <b>Disease indication</b>        | <b>Target Name</b> |
|------------------|--------------------------------------|--------------------------|----------------------------------|--------------------|
| Bosutinib        | Approved                             | C00-D48                  | Chronic myelogenous leukemia     | ABL1               |
| Dasatinib        | Approved                             | C00-D48                  | Acute lymphoblastic leukemia     | ABL1               |
| Imatinib         | Approved                             | C00-D48                  | Ph+ chronic myelogenous leukemia | ABL1               |
| Nilotinib        | Approved                             | C00-D48                  | Ph+ Chronic myelogenous leukemia | ABL1               |
| Ponatinib        | Approved                             | C00-D48                  | Ph+ Chronic myelogenous leukemia | ABL1               |
| ABL-001          | Phase 1                              | C00-D48                  | Leukemia                         | ABL1               |
| Rebastinib       | Phase 1                              | C00-D48                  | Chronic myelogenous leukemia     | ABL1               |
| Bafetinib        | Phase 2                              | C00-D48                  | Prostate cancer                  | ABL1               |
| Danusertib       | Phase 2                              | C00-D48                  | Chronic myelogenous leukemia     | ABL1               |
| Flumatinib       | Phase 3                              | C00-D48                  | Chronic myelogenous leukemia     | ABL1               |
| Radotinib        | Phase 3                              | C00-D48                  | Chronic myelogenous leukemia     | ABL1               |
| Alectinib        | Approved                             | C00-D48                  | Non-small-cell lung carcinoma    | ALK                |
| Ceritinib        | Approved                             | C00-D48                  | Non-small-cell lung carcinoma    | ALK                |
| Crizotinib       | Approved                             | C00-D48                  | Non-small-cell lung carcinoma    | ALK                |
| Brigatinib       | Phase 2                              | C00-D48                  | Non-small-cell lung carcinoma    | ALK                |
| Entrectinib      | Phase 2                              | C00-D48                  | Solid tumours                    | ALK                |
| Dabrafenib       | Approved                             | C00-D48                  | Malignant melanoma               | BRAF               |
| Sorafenib        | Approved                             | C00-D48                  | Hepatocellular carcinoma         | BRAF               |
| Vemurafenib      | Approved                             | C00-D48                  | Malignant melanoma               | BRAF               |
| RAF-265          | Phase 2                              | C00-D48                  | Malignant melanoma               | BRAF               |
| Ibrutinib        | Approved                             | C00-D48                  | Chronic lymphocytic leukemia     | BTK                |
| Palbociclib      | Approved                             | C00-D48                  | Breast cancer                    | CDK4/6             |

|               |           |         |                               |      |
|---------------|-----------|---------|-------------------------------|------|
| Afatinib      | Approved  | C00-D48 | Non-small-cell lung carcinoma | EGFR |
| Cetuximab     | Approved  | C00-D48 | Colorectal cancer             | EGFR |
| Erlotinib     | Approved  | C00-D48 | Non-small-cell lung carcinoma | EGFR |
| Gefitinib     | Approved  | C00-D48 | Non-small-cell lung carcinoma | EGFR |
| Lapatinib     | Approved  | C00-D48 | Breast cancer                 | EGFR |
| Necitumumab   | Approved  | C00-D48 | Non-small-cell lung carcinoma | EGFR |
| Osimertinib   | Approved  | C00-D48 | Non-small-cell lung carcinoma | EGFR |
| Panitumumab   | Approved  | C00-D48 | Colorectal cancer             | EGFR |
| Vandetanib    | Approved  | C00-D48 | Thyroid cancer                | EGFR |
| ABT-806       | Phase 1   | C00-D48 | Solid tumours                 | EGFR |
| AMG-595       | Phase 1   | C00-D48 | Anaplastic astrocytoma        | EGFR |
| BIBX-1382     | Phase 1   | C00-D48 | Cancer                        | EGFR |
| BMS-599626    | Phase 1   | C00-D48 | Solid tumours                 | EGFR |
| CUDC-101      | Phase 1   | C00-D48 | Breast cancer                 | EGFR |
| Imgatuzumab   | Phase 1   | C00-D48 | Head and neck cancer          | EGFR |
| IMGN-289      | Phase 1   | C00-D48 | Solid tumours                 | EGFR |
| JNJ-26483327  | Phase 1   | C00-D48 | Solid tumours                 | EGFR |
| MM-151        | Phase 1   | C00-D48 | Solid tumours                 | EGFR |
| MR1-1         | Phase 1   | C00-D48 | Malignant Brain Tumor         | EGFR |
| Pelitinib     | Phase 1   | C00-D48 | Solid tumours                 | EGFR |
| AEE-788       | Phase 1/2 | C00-D48 | Glioblastoma                  | EGFR |
| EGF-816       | Phase 1/2 | C00-D48 | Non-small-cell lung carcinoma | EGFR |
| ABT-414       | Phase 2   | C00-D48 | Glioblastoma                  | EGFR |
| Canertinib    | Phase 2   | C00-D48 | Breast cancer                 | EGFR |
| Duligotuzumab | Phase 2   | C00-D48 | Head and neck cancer          | EGFR |

|              |          |         |                               |       |
|--------------|----------|---------|-------------------------------|-------|
| Modotuximab  | Phase 2  | C00-D48 | Colorectal cancer             | EGFR  |
| Matuzumab    | Phase 2  | C00-D48 | Gastric cancer                | EGFR  |
| Sapitinib    | Phase 2  | C00-D48 | Colorectal cancer             | EGFR  |
| ASP-8273     | Phase 3  | C00-D48 | Non-small-cell lung carcinoma | EGFR  |
| Dacomitinib  | Phase 3  | C00-D48 | Non-small-cell lung carcinoma | EGFR  |
| Icotinib     | Phase 3  | C00-D48 | Non-small-cell lung carcinoma | EGFR  |
| Rindopepimut | Phase 3  | C00-D48 | Glioblastoma                  | EGFR  |
| Rociletinib  | Phase 3  | C00-D48 | Non-small-cell lung carcinoma | EGFR  |
| Tesevatinib  | Phase 3  | C00-D48 | Non-small-cell lung carcinoma | EGFR  |
| Zalutumumab  | Phase 3  | C00-D48 | Head and neck cancer          | EGFR  |
| Afatinib     | Approved | C00-D48 | Non-small-cell lung carcinoma | ERBB2 |
| Lapatinib    | Approved | C00-D48 | Breast cancer                 | ERBB2 |
| Pertuzumab   | Approved | C00-D48 | Breast cancer                 | ERBB2 |
| Trastuzumab  | Approved | C00-D48 | Breast cancer                 | ERBB2 |
| BMS-599626   | Phase 1  | C00-D48 | Solid tumours                 | ERBB2 |
| CUDC-101     | Phase 1  | C00-D48 | Breast cancer                 | ERBB2 |
| Pozotinib    | Phase 2  | C00-D48 | Breast cancer                 | ERBB2 |
| Varlitinib   | Phase 2  | C00-D48 | Breast cancer                 | ERBB2 |
| Neratinib    | Phase 3  | C00-D48 | Breast cancer                 | ERBB2 |
| Palifermin   | Approved | C00-D48 | Oral mucositis                | FGFR1 |
| FP-1039      | Phase 2  | C00-D48 | Mesothelioma                  | FGFR1 |
| Lucitanib    | Phase 2  | C00-D48 | Breast cancer                 | FGFR1 |
| Sulfatinib   | Phase 3  | C00-D48 | Neuroendocrine tumours        | FGFR1 |
| AVE-1642     | Phase 1  | C00-D48 | Multiple myeloma              | IGF1R |
| BIIB-022     | Phase 1  | C00-D48 | Hepatocellular carcinoma      | IGF1R |

|                  |          |         |                                  |       |
|------------------|----------|---------|----------------------------------|-------|
| KW-2450          | Phase 1  | C00-D48 | Solid tumours                    | IGF1R |
| MM-141           | Phase 1  | C00-D48 | Hepatocellular carcinoma         | IGF1R |
| XL-228           | Phase 1  | C00-D48 | Leukemia                         | IGF1R |
| BMS-754807       | Phase 2  | C00-D48 | Breast cancer                    | IGF1R |
| Cixutumumab      | Phase 2  | C00-D48 | Cancer                           | IGF1R |
| Dalotuzumab      | Phase 2  | C00-D48 | Neuroendocrine tumours           | IGF1R |
| Masoprocol       | Phase 2  | C00-D48 | Prostate cancer                  | IGF1R |
| Picropodophyllin | Phase 2  | C00-D48 | Non-small-cell lung carcinoma    | IGF1R |
| Teprotumumab     | Phase 2  | C00-D48 | Advanced Breast cancer           | IGF1R |
| Figitumumab      | Phase 3  | C00-D48 | Multiple myeloma                 | IGF1R |
| Ganitumab        | Phase 3  | C00-D48 | Solid tumours                    | IGF1R |
| Linsitinib       | Phase 3  | C00-D48 | Multiple myeloma                 | IGF1R |
| Insulin          | Approved | C00-D48 | Diabetes mellitus                | INSR  |
| Ruxolitinib      | Approved | C00-D48 | Myelofibrosis                    | JAK2  |
| Tofacitinib      | Approved | L00-L99 | Rheumatoid arthritis             | JAK3  |
| Axitinib         | Approved | C00-D48 | Renal cancer                     | KDR   |
| Cabozantinib     | Approved | C00-D48 | Thyroid cancer                   | KDR   |
| Lenvatinib       | Approved | C00-D48 | Thyroid cancer                   | KDR   |
| Nintedanib       | Approved | C00-D48 | Non-small-cell lung carcinoma    | KDR   |
| Pazopanib        | Approved | C00-D48 | Renal cancer                     | KDR   |
| Ramucirumab      | Approved | C00-D48 | Colorectal cancer                | KDR   |
| Regorafenib      | Approved | C00-D48 | Colorectal cancer                | KDR   |
| Sorafenib        | Approved | C00-D48 | Hepatocellular carcinoma         | KDR   |
| Sunitinib        | Approved | C00-D48 | Gastrointestinal stromal tumours | KDR   |
| Vandetanib       | Approved | C00-D48 | Thyroid cancer                   | KDR   |

|              |           |         |                                  |     |
|--------------|-----------|---------|----------------------------------|-----|
| CYC-116      | Phase 1   | C00-D48 | Solid tumours                    | KDR |
| OSI-930      | Phase 1   | C00-D48 | Solid tumours                    | KDR |
| TAK-593      | Phase 1   | C00-D48 | Solid tumours                    | KDR |
| JI-101       | Phase 1/2 | C00-D48 | Solid tumours                    | KDR |
| Orantinib    | Phase 1/2 | C00-D48 | Hepatocellular carcinoma         | KDR |
| ENMD-2076    | Phase 2   | C00-D48 | Breast cancer                    | KDR |
| Lucitanib    | Phase 2   | C00-D48 | Breast cancer                    | KDR |
| Motesanib    | Phase 2   | C00-D48 | Breast cancer                    | KDR |
| XL-999       | Phase 2   | C00-D48 | Cancer                           | KDR |
| Cediranib    | Phase 3   | C00-D48 | Colorectal cancer                | KDR |
| Famitinib    | Phase 3   | C00-D48 | Colorectal cancer                | KDR |
| Fruquintinib | Phase 3   | C00-D48 | Colorectal cancer                | KDR |
| Sulfatinib   | Phase 3   | C00-D48 | Neuroendocrine tumours           | KDR |
| Tivozanib    | Phase 3   | C00-D48 | Hepatocellular carcinoma         | KDR |
| Imatinib     | Approved  | C00-D48 | Ph+ chronic myelogenous leukemia | KIT |
| Lenvatinib   | Approved  | C00-D48 | Thyroid cancer                   | KIT |
| Pazopanib    | Approved  | C00-D48 | Renal cancer                     | KIT |
| Ponatinib    | Approved  | C00-D48 | Ph+ Chronic myelogenous leukemia | KIT |
| Sorafenib    | Approved  | C00-D48 | Hepatocellular carcinoma         | KIT |
| Sunitinib    | Approved  | C00-D48 | Gastrointestinal stromal tumours | KIT |
| Amuvatinib   | Phase 1   | C00-D48 | Solid tumours                    | KIT |
| OSI-930      | Phase 1   | C00-D48 | Solid tumours                    | KIT |
| Motesanib    | Phase 2   | C00-D48 | Breast cancer                    | KIT |
| XL-820       | Phase 2   | C00-D48 | Gastrointestinal stromal tumours | KIT |
| Famitinib    | Phase 3   | C00-D48 | Colorectal cancer                | KIT |

|              |           |         |                               |        |
|--------------|-----------|---------|-------------------------------|--------|
| Cobimetinib  | Approved  | C00-D48 | Malignant melanoma            | MAP2K1 |
| Trametinib   | Approved  | C00-D48 | Malignant melanoma            | MAP2K1 |
| RG-7304      | Phase 1   | C00-D48 | Solid tumours                 | MAP2K1 |
| Cabozantinib | Approved  | C00-D48 | Thyroid cancer                | MET    |
| Altiratinib  | Phase 1   | C00-D48 | Solid tumours                 | MET    |
| Everolimus   | Approved  | C00-D48 | HER2-negative breast cancer   | mTOR   |
| Sirolimus    | Approved  | J00-J99 | Lymphangioliomyomatosis       | mTOR   |
| Temsirolimus | Approved  | C00-D48 | Advanced renal cell carcinoma | mTOR   |
| AZD-8055     | Phase 1   | C00-D48 | Solid tumours                 | mTOR   |
| CC-115       | Phase 1   | C00-D48 | Multiple myeloma              | mTOR   |
| DS-3078      | Phase 1   | C00-D48 | Lymphoma                      | mTOR   |
| DS-7423      | Phase 1   | C00-D48 | Solid tumours                 | mTOR   |
| GDC-0349     | Phase 1   | C00-D48 | Non-Hodgkin's lymphoma        | mTOR   |
| OSI-027      | Phase 1   | C00-D48 | Lymphoma                      | mTOR   |
| PWT-33597    | Phase 1   | C00-D48 | Solid tumours                 | mTOR   |
| VS-5584      | Phase 1   | C00-D48 | Lymphoma                      | mTOR   |
| BGT-226      | Phase 1/2 | C00-D48 | Solid tumours                 | mTOR   |
| CC-223       | Phase 1/2 | C00-D48 | Multiple myeloma              | mTOR   |
| Apitolisib   | Phase 2   | C00-D48 | Breast cancer                 | mTOR   |
| AZD-2014     | Phase 2   | C00-D48 | Non-small-cell lung carcinoma | mTOR   |
| Dactolisib   | Phase 2   | C00-D48 | Solid tumours                 | mTOR   |
| Gedatolisib  | Phase 2   | C00-D48 | Acute myeloid leukemia        | mTOR   |
| LY-3023414   | Phase 2   | C00-D48 | Endometrial cancer            | mTOR   |
| PF-4691502   | Phase 2   | C00-D48 | Breast cancer                 | mTOR   |
| Sapanisertib | Phase 2   | C00-D48 | Prostate cancer               | mTOR   |

|               |           |         |                                  |        |
|---------------|-----------|---------|----------------------------------|--------|
| Voxtalisib    | Phase 2   | C00-D48 | Solid tumours                    | mTOR   |
| Ridaforolimus | Phase 3   | I00-I99 | Coronary artery restenosis       | mTOR   |
| Nesiritide    | Approved  | I00-I99 | Congestive heart Failure         | NPR1   |
| Becaplermin   | Approved  | C00-D48 | Skin cancer                      | PDGFRA |
| Imatinib      | Approved  | C00-D48 | Ph+ chronic myelogenous leukemia | PDGFRA |
| Nintedanib    | Approved  | C00-D48 | Non-small-cell lung carcinoma    | PDGFRA |
| Amuvatinib    | Phase 1   | C00-D48 | Solid tumours                    | PDGFRA |
| Crenolanib    | Phase 2   | C00-D48 | Acute myeloid leukemia           | PDGFRA |
| Tovetumab     | Phase 2   | C00-D48 | Glioblastoma                     | PDGFRA |
| Olaratumab    | Phase 3   | C00-D48 | Gastrointestinal stromal tumours | PDGFRA |
| Becaplermin   | Approved  | C00-D48 | Skin cancer                      | PDGFRB |
| Imatinib      | Approved  | C00-D48 | Ph+ chronic myelogenous leukemia | PDGFRB |
| Nintedanib    | Approved  | C00-D48 | Non-small-cell lung carcinoma    | PDGFRB |
| Pazopanib     | Approved  | C00-D48 | Renal cancer                     | PDGFRB |
| Sorafenib     | Approved  | C00-D48 | Hepatocellular carcinoma         | PDGFRB |
| Sunitinib     | Approved  | C00-D48 | Gastrointestinal stromal tumours | PDGFRB |
| TAK-593       | Phase 1   | C00-D48 | Solid tumours                    | PDGFRB |
| J1-101        | Phase 1/2 | C00-D48 | Solid tumours                    | PDGFRB |
| Crenolanib    | Phase 2   | C00-D48 | Acute myeloid leukemia           | PDGFRB |
| sNN-0031      | Phase 2   | G00-G99 | Parkinson's disease              | PDGFRB |
| Idelalisib    | Approved  | C00-D48 | Chronic lymphocytic leukemia     | PIK3CD |
| GSK-2269557   | Phase 2   | J00-J99 | COPD                             | PIK3CD |
| Metformin     | Approved  | C00-D48 | Type 2 diabetes mellitus         | PRKAA  |
| Acadesine     | Phase 3   | C00-D48 | Myelodysplastic syndromes        | PRKAA  |
| Sorafenib     | Approved  | C00-D48 | Hepatocellular carcinoma         | RET    |



|             |           |         |                              |     |
|-------------|-----------|---------|------------------------------|-----|
| Bosutinib   | Approved  | C00-D48 | Chronic myelogenous leukemia | SRC |
| Dasatinib   | Approved  | C00-D48 | Acute lymphoblastic leukemia | SRC |
| XL-228      | Phase 1   | C00-D48 | Acute lymphoblastic leukemia | SRC |
| Saracatinib | Phase 2/3 | C00-D48 | Breast cancer                | SRC |
| Regorafenib | Approved  | C00-D48 | Colorectal cancer            | TEK |
| CEP-11981   | Phase 1   | C00-D48 | Solid tumours                | TEK |

**Supplementary Table S2:** The list of drugs targeting on at least one clinical trial kinase target together with their highest clinical trial status, code of ICD class, disease indication and their corresponding targets.

| Drug name     | Highest clinical trial status | Code of ICD class | Indication                   | Gene name of the target |
|---------------|-------------------------------|-------------------|------------------------------|-------------------------|
| Ascrinvacumab | Phase 2                       | C00-D48           | Hepatocellular carcinoma     | ACVRL1                  |
| ARQ-092       | Phase 1                       | C00-D48           | Solid tumours                | AKT                     |
| BAY-1125976   | Phase 1                       | C00-D48           | Solid tumours                | AKT                     |
| GSK-690693    | Phase 1                       | C00-D48           | Lymphoma                     | AKT                     |
| LY-2780301    | Phase 1                       | C00-D48           | Solid tumours                | AKT                     |
| MSC-2363318A  | Phase 1                       | C00-D48           | Solid tumours                | AKT                     |
| SR-13668      | Phase 1                       | C00-D48           | Cancer                       | AKT                     |
| Triciribine   | Phase 1                       | C00-D48           | Haematological malignancies  | AKT                     |
| XL-418        | Phase 1                       | C00-D48           | Solid tumours                | AKT                     |
| Afuresertib   | Phase 2                       | C00-D48           | Haematological malignancies  | AKT                     |
| AZD-5363      | Phase 2                       | C00-D48           | Breast cancer                | AKT                     |
| Ipatasertib   | Phase 2                       | C00-D48           | Breast cancer                | AKT                     |
| MK-2206       | Phase 2                       | C00-D48           | Haematological malignancies  | AKT                     |
| Uprosertib    | Phase 2                       | C00-D48           | Acute myeloid leukemia       | AKT                     |
| AZD-6738      | Phase 1                       | C00-D48           | Gastric cancer               | ATR                     |
| VX-970        | Phase 2                       | C00-D48           | Small cell lung cancer       | ATR                     |
| AMG-900       | Phase 1                       | C00-D48           | Haematological malignancies  | AURKA                   |
| CYC-116       | Phase 1                       | C00-D48           | Solid tumours                | AURKA                   |
| KW-2449       | Phase 1                       | C00-D48           | Acute lymphoblastic leukemia | AURKA                   |
| XL-228        | Phase 1                       | C00-D48           | Acute lymphoblastic leukemia | AURKA                   |
| AT-9283       | Phase 2                       | C00-D48           | Acute myeloid leukemia       | AURKA                   |
| Danusertib    | Phase 2                       | C00-D48           | Leukemia                     | AURKA                   |

|              |           |         |                              |        |
|--------------|-----------|---------|------------------------------|--------|
| ENMD-2076    | Phase 2   | C00-D48 | Breast cancer                | AURKA  |
| Tozasertib   | Phase 2   | C00-D48 | Colorectal cancer            | AURKA  |
| AMG-900      | Phase 1   | C00-D48 | Haematological malignancies  | AURKB  |
| BI-811283    | Phase 1   | C00-D48 | Acute myeloid leukemia       | AURKB  |
| BI-831266    | Phase 1   | C00-D48 | Solid tumours                | AURKB  |
| BI-847325    | Phase 1   | C00-D48 | Solid tumours                | AURKB  |
| CYC-116      | Phase 1   | C00-D48 | Solid tumours                | AURKB  |
| GSK-1070916A | Phase 1   | C00-D48 | Solid tumours                | AURKB  |
| TAK-901      | Phase 1   | C00-D48 | Haematological malignancies  | AURKB  |
| AT-9283      | Phase 2   | C00-D48 | Acute myeloid leukemia       | AURKB  |
| Danusertib   | Phase 2   | C00-D48 | Chronic myelogenous leukemia | AURKB  |
| Ilorasertib  | Phase 2   | C00-D48 | Haematological malignancies  | AURKB  |
| Tozasertib   | Phase 2   | C00-D48 | Colorectal cancer            | AURKB  |
| Barasertib   | Phase 2/3 | C00-D48 | Acute myeloid leukemia       | AURKB  |
| Rimacalib    | Phase 2   | M00-M99 | Rheumatoid arthritis         | CaMKII |
| NMS-1116354  | Phase 1   | C00-D48 | Solid tumours                | CDC7   |
| XL-413       | Phase 1/2 | C00-D48 | Haematological malignancies  | CDC7   |
| AG-24322     | Phase 1   | C00-D48 | Cancer                       | CDK1/2 |
| AZD-5438     | Phase 1   | C00-D48 | Solid tumours                | CDK1/2 |
| PHA-793887   | Phase 1   | C00-D48 | Solid tumours                | CDK1/2 |
| RGB-286638   | Phase 1   | C00-D48 | Solid tumours                | CDK1/2 |
| Roniciclib   | Phase 1   | C00-D48 | Solid tumours                | CDK1/2 |
| SNS-032      | Phase 1   | C00-D48 | B-cell lymphoma              | CDK1/2 |
| TG-02        | Phase 1   | C00-D48 | Haematological malignancie   | CDK1/2 |
| AT-7519      | Phase 2   | C00-D48 | Chronic lymphocytic leukemia | CDK1/2 |

|              |           |         |                               |        |
|--------------|-----------|---------|-------------------------------|--------|
| Milciclib    | Phase 2   | C00-D48 | Thymoma                       | CDK1/2 |
| P-276        | Phase 2   | C00-D48 | Head and neck cancer          | CDK1/2 |
| Selaciclib   | Phase 2   | C00-D48 | Nasopharyngeal cancer         | CDK1/2 |
| UCN-01       | Phase 2   | C00-D48 | Acute myeloid leukemia        | CDK1/2 |
| Dinaciclib   | Phase 3   | C00-D48 | Chronic myelogenous leukemia  | CDK1/2 |
| Alvocidib    | Phase 2   | C00-D48 | Acute myeloid leukemia        | CDK9   |
| GDC-0425     | Phase 1   | C00-D48 | Lymphoma                      | CHEK1  |
| GDC-0575     | Phase 1   | C00-D48 | Lymphoma                      | CHEK1  |
| PF-477736    | Phase 1   | C00-D48 | Solid tumours                 | CHEK1  |
| Rabusertib   | Phase 1   | C00-D48 | Cancer                        | CHEK1  |
| XL-844       | Phase 1   | C00-D48 | Chronic lymphocytic leukemia  | CHEK1  |
| MK-8776      | Phase 2   | C00-D48 | Acute myeloid leukemia        | CHEK1  |
| Prexasertib  | Phase 2   | C00-D48 | Breast cancer                 | CHEK1  |
| UCN-01       | Phase 2   | C00-D48 | Acute myeloid leukemia        | CHEK1  |
| TCD-717      | Phase 1   | C00-D48 | Solid tumours                 | CHKA   |
| CX-4945      | Phase 1   | C00-D48 | Multiple myeloma              | CK2    |
| CIGB-300     | Phase 2/3 | C00-D48 | Condylomata acuminata         | CK2    |
| AV-203       | Phase 1   | C00-D48 | Solid tumours                 | ERBB3  |
| Elgemtumab   | Phase 1   | C00-D48 | Breast cancer                 | ERBB3  |
| GSK-2849330  | Phase 1   | C00-D48 | Solid tumours                 | ERBB3  |
| KTN-3379     | Phase 1   | C00-D48 | Head and neck cancer          | ERBB3  |
| Lumretuzumab | Phase 1   | C00-D48 | Non-small-cell lung carcinoma | ERBB3  |
| MM-141       | Phase 1   | C00-D48 | Hepatocellular carcinoma      | ERBB3  |
| REGN-1400    | Phase 1   | C00-D48 | Cancer                        | ERBB3  |
| Patritumab   | Phase 1/2 | C00-D48 | Non-small-cell lung carcinoma | ERBB3  |

|               |         |         |                             |        |
|---------------|---------|---------|-----------------------------|--------|
| Duligotuzumab | Phase 2 | C00-D48 | Head and neck cancer        | ERBB3  |
| Seribantumab  | Phase 2 | C00-D48 | Breast cancer               | ERBB3  |
| AZD-5658      | Phase 1 | E00-E90 | Type 2 diabetes mellitus    | GCK    |
| AZD-6370      | Phase 1 | E00-E90 | Type 2 diabetes mellitus    | GCK    |
| AZD-6714      | Phase 1 | E00-E90 | Type 2 diabetes mellitus    | GCK    |
| BMS-820132    | Phase 1 | E00-E90 | Type 2 diabetes mellitus    | GCK    |
| DS-7309       | Phase 1 | E00-E90 | Type 2 diabetes mellitus    | GCK    |
| TAK-329       | Phase 1 | E00-E90 | Type 1 diabetes mellitus    | GCK    |
| ARRY-403      | Phase 2 | E00-E90 | Type 2 diabetes mellitus    | GCK    |
| AZD-1656      | Phase 2 | E00-E90 | Type 2 diabetes mellitus    | GCK    |
| LY-2608204    | Phase 2 | E00-E90 | Type 2 diabetes mellitus    | GCK    |
| PF-4937319    | Phase 2 | E00-E90 | Type 2 diabetes mellitus    | GCK    |
| PF-4991532    | Phase 2 | E00-E90 | Type 2 diabetes mellitus    | GCK    |
| PSN-010       | Phase 2 | E00-E90 | Type 2 diabetes mellitus    | GCK    |
| TTP-399       | Phase 2 | E00-E90 | Type 2 diabetes mellitus    | GCK    |
| LY-2090314    | Phase 2 | C00-D48 | Pancreatic cancer           | GSK3A  |
| LY-2090314    | Phase 2 | C00-D48 | Pancreatic cancer           | GSK3B  |
| Tideglusib    | Phase 2 | G00-G99 | Alzheimer's disease         | GSK3B  |
| CC-401        | Phase 1 | C00-D48 | Acute myeloid leukemia      | JNK    |
| Tanzisertib   | Phase 2 | L00-L99 | Discoid lupus erythematosus | JNK    |
| XG-102        | Phase 3 | H00-H59 | Ocular inflammation         | JNK    |
| GS-4997       | Phase 2 | I00-I99 | Diabetic nephropathies      | MAP3K5 |
| Dilmapimod    | Phase 2 | J00-J99 | COPD                        | MAPK14 |
| Talmapimod    | Phase 2 | C00-D48 | Multiple myeloma            | MAPK14 |
| VX-702        | Phase 2 | M00-M99 | Rheumatoid arthritis        | MAPK14 |

|             |           |         |                               |        |
|-------------|-----------|---------|-------------------------------|--------|
| OTS-167     | Phase 1   | C00-D48 | Solid tumours                 | MELK   |
| PF-3758309  | Phase 1   | C00-D48 | Solid tumours                 | PAK4   |
| AR-12       | Phase 1   | C00-D48 | Lymphoma                      | PDPK1  |
| PFK-158     | Phase 1   | C00-D48 | Solid tumours                 | PFKFB3 |
| CH-5132799  | Phase 1   | C00-D48 | Solid tumours                 | PI3K   |
| CUDC-907    | Phase 1   | C00-D48 | Diffuse large B-cell lymphoma | PI3K   |
| DS-7423     | Phase 1   | C00-D48 | Solid tumours                 | PI3K   |
| GDC-0084    | Phase 1   | C00-D48 | Glioma                        | PI3K   |
| Omipalisib  | Phase 1   | C00-D48 | Solid tumours                 | PI3K   |
| PWT-33597   | Phase 1   | C00-D48 | Solid tumours                 | PI3K   |
| SF-1126     | Phase 1   | C00-D48 | Neuroblastoma                 | PI3K   |
| VS-5584     | Phase 1   | C00-D48 | Lymphoma                      | PI3K   |
| ZSTK-474    | Phase 1   | C00-D48 | Solid tumours                 | PI3K   |
| BGT-226     | Phase 1/2 | C00-D48 | Solid tumours                 | PI3K   |
| CLR-457     | Phase 1/2 | C00-D48 | Solid tumours                 | PI3K   |
| Apitolisib  | Phase 2   | C00-D48 | Non-Hodgkin's lymphoma        | PI3K   |
| Dactolisib  | Phase 2   | C00-D48 | Solid tumours                 | PI3K   |
| Gedatolisib | Phase 2   | C00-D48 | Acute myeloid leukemia        | PI3K   |
| PF-4691502  | Phase 2   | C00-D48 | Breast cancer                 | PI3K   |
| Pictrelisib | Phase 2   | C00-D48 | Breast cancer                 | PI3K   |
| Pilaralisib | Phase 2   | C00-D48 | Lymphoma                      | PI3K   |
| Voxtalisisb | Phase 2   | C00-D48 | Solid tumours                 | PI3K   |
| Copanlisib  | Phase 3   | C00-D48 | Non-Hodgkin's lymphoma        | PI3K   |
| Rigosertib  | Phase 3   | C00-D48 | Chronic myelogenous leukemia  | PI3K   |
| BAY-1082439 | Phase 1   | C00-D48 | Solid tumours                 | PIK3CA |

|             |           |         |                               |        |
|-------------|-----------|---------|-------------------------------|--------|
| CH-5132799  | Phase 1   | C00-D48 | Solid tumours                 | PIK3CA |
| PWT-33597   | Phase 1   | C00-D48 | Solid tumours                 | PIK3CA |
| MLN-1117    | Phase 1/2 | C00-D48 | Non-small-cell lung carcinoma | PIK3CA |
| Alpelisib   | Phase 2   | C00-D48 | Breast cancer                 | PIK3CA |
| LY-3023414  | Phase 2   | C00-D48 | Endometrial cancer            | PIK3CA |
| Sonolisib   | Phase 2   | C00-D48 | Colorectal cancer             | PIK3CA |
| Buparlisib  | Phase 3   | C00-D48 | Breast cancer                 | PIK3CA |
| Taselisib   | Phase 3   | C00-D48 | Breast cancer                 | PIK3CA |
| AZD-6482    | Phase 1   | I00-I99 | Thrombosis                    | PIK3CB |
| AZD-8186    | Phase 1   | C00-D48 | Breast cancer                 | PIK3CB |
| GSK-2636771 | Phase 1   | C00-D48 | Solid tumours                 | PIK3CB |
| SAR-260301  | Phase 1   | C00-D48 | Lymphoma                      | PIK3CB |
| Taselisib   | Phase 3   | C00-D48 | Breast cancer                 | PIK3CB |
| AZD-1208    | Phase 1   | C00-D48 | Acute myeloid leukemia        | PIM1   |
| PIM-447     | Phase 1   | C00-D48 | Multiple myeloma              | PIM1   |
| AZD-1208    | Phase 1   | C00-D48 | Acute myeloid leukemia        | PIM2   |
| PIM-447     | Phase 1   | C00-D48 | Multiple myeloma              | PIM2   |
| AZD-1208    | Phase 1   | C00-D48 | Acute myeloid leukemia        | PIM3   |
| PIM-447     | Phase 1   | C00-D48 | Multiple myeloma              | PIM3   |
| TLN-232     | Phase 2   | C00-D48 | Malignant melanoma            | PKM    |
| GSK-461364  | Phase 1   | C00-D48 | Non-Hodgkin's lymphoma        | PLK1   |
| MK-1496     | Phase 1   | C00-D48 | Solid tumours                 | PLK1   |
| NMS-1286937 | Phase 1   | C00-D48 | Solid tumours                 | PLK1   |
| TAK-960     | Phase 1   | C00-D48 | Acute myeloid leukemia        | PLK1   |
| BI-2536     | Phase 2   | C00-D48 | Acute myeloid leukemia        | PLK1   |

|               |           |         |                                 |          |
|---------------|-----------|---------|---------------------------------|----------|
| Volasertib    | Phase 2   | C00-D48 | Acute myeloid leukemia          | PLK1     |
| BI-853520     | Phase 1   | C00-D48 | Solid tumours                   | PTK2     |
| PF-562271     | Phase 1   | C00-D48 | Cancer                          | PTK2     |
| VS-4718       | Phase 1   | C00-D48 | Solid tumours                   | PTK2     |
| Defactinib    | Phase 2   | C00-D48 | Mesothelioma                    | PTK2     |
| GSK-2256098   | Phase 2   | C00-D48 | Meningioma                      | PTK2     |
| INS-117548    | Phase 1   | H00-H59 | Glaucoma                        | ROCK2    |
| KD-025        | Phase 2   | J00-J99 | Plaque psoriasis                | ROCK2    |
| ABC-294640    | Phase 1/2 | C00-D48 | Diffuse large B-cell lymphoma   | SPHK2    |
| PF-3526299    | Phase 1   | J00-J99 | Asthma                          | SYK      |
| TAK-659       | Phase 1/2 | C00-D48 | Acute myeloid leukemia          | SYK      |
| Entospletinib | Phase 2   | C00-D48 | Haematological malignancies     | SYK      |
| PRT-062607    | Phase 2   | C00-D48 | Rheumatoid arthritis            | SYK      |
| R-343         | Phase 2   | J00-J99 | Allergic asthma                 | SYK      |
| Fostamatinib  | Phase 3   | D50-D89 | Immune thrombocytopenic purpura | SYK      |
| Fresolimumab  | Phase 2   | C00-D48 | Renal cancer                    | TGF-beta |
| TEW-7197      | Phase 1   | C00-D48 | Solid tumours                   | TGFBR1   |
| Galunisertib  | Phase 2/3 | C00-D48 | Hepatocellular carcinoma        | TGFBR1   |
| Altiratinib   | Phase 1   | C00-D48 | Solid tumours                   | Trk      |
| AZD-6918      | Phase 1   | C00-D48 | Solid tumours                   | Trk      |
| DS-6051       | Phase 1   | C00-D48 | Solid tumours                   | Trk      |
| PLX-7486      | Phase 1   | C00-D48 | Solid tumours                   | Trk      |
| Entrectinib   | Phase 2   | C00-D48 | Solid tumours                   | Trk      |
| LOXO-101      | Phase 2   | C00-D48 | Solid tumours                   | Trk      |
| MK-1775       | Phase 2   | C00-D48 | Gynaecological cancer           | WEE1     |



**Supplementary Figure S1:** The distribution of 3 types of system profiles of phase 1, 2 and 3 clinical trial kinase targets and that of established targets illustrated by the *boxplot*.

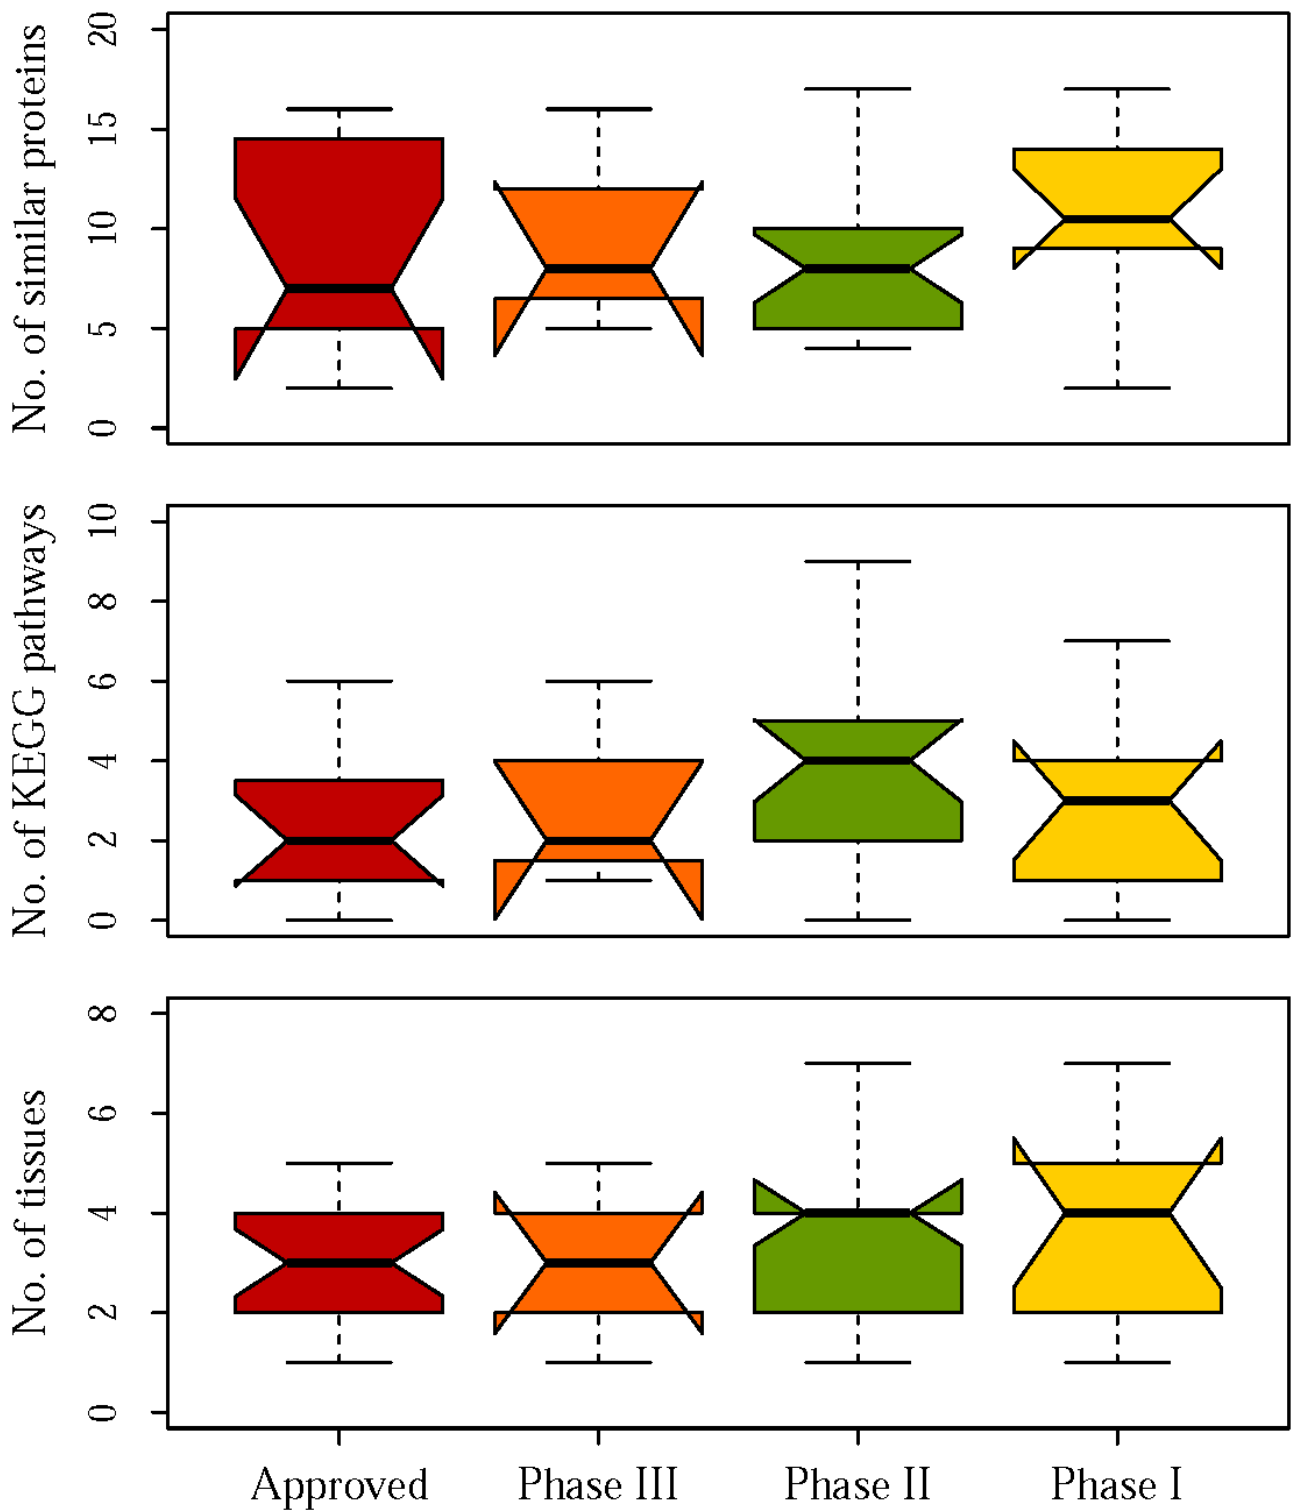

**Supplementary Figure S2:** A comprehensive drug-target interaction network (part one) including all 46 FDA approved drugs (together with their corresponding 25 established targets) and 239 drugs in clinical trial (including 81 drugs targeting only on 17 established targets, 140 drugs targeting only on 36 clinical trial targets, and 29 multi-target drugs targeting on 13 established and 13 clinical trial targets). Drugs were shown as a round rectangle (approved, phase 3, phase 2 and phase 1 drugs in red, orange, green and yellow, respectively). Established and clinical trial targets were shown by blue and violet ellipses, respectively.

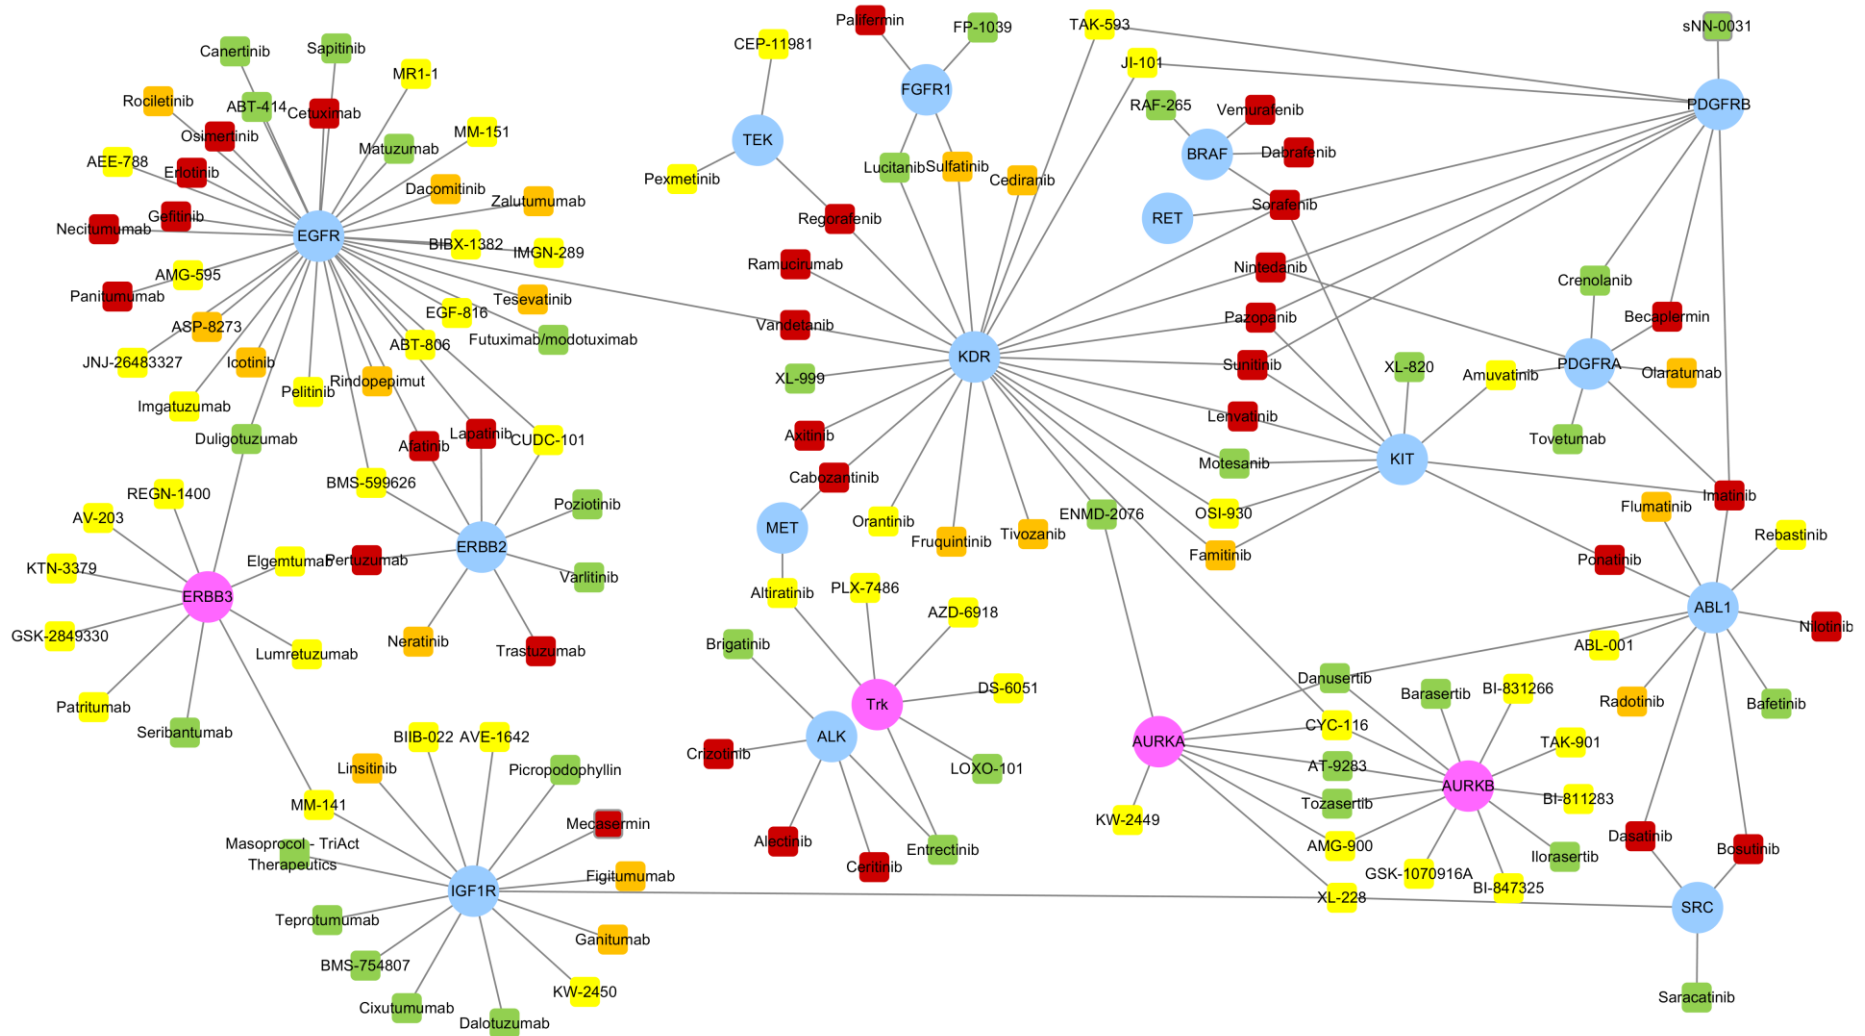

**Supplementary Figure S3:** A comprehensive drug-target interaction network (part two) including all 46 FDA approved drugs (together with their corresponding 25 established targets) and 239 drugs in clinical trial (including 81 drugs targeting only on 17 established targets, 140 drugs targeting only on 36 clinical trial targets, and 29 multi-target drugs targeting on 13 established and 13 clinical trial targets). Drugs were shown as a round rectangle (approved, phase 3, phase 2 and phase 1 drugs in red, orange, green and yellow, respectively). Established and clinical trial targets were shown by blue and violet ellipses, respectively.

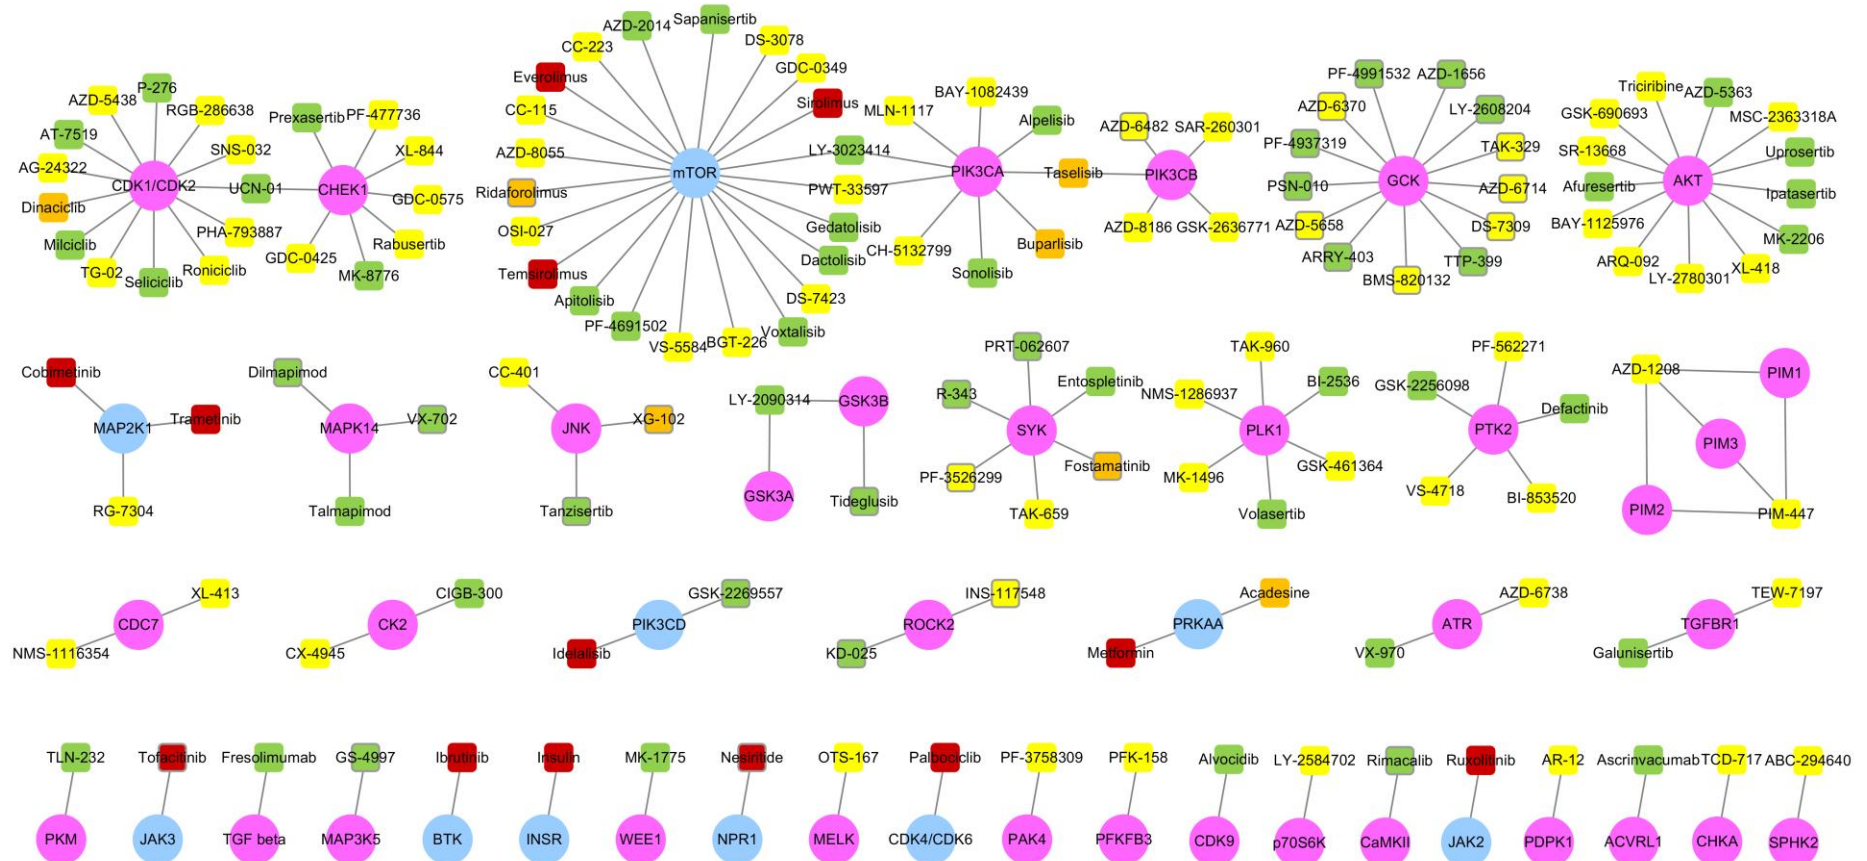

Supplement: 2509385.f1.pdf [file 2509385.f1.pdf]
